# Supplementary material
Source: Springer Nature journal article supplement (https://www.springermedizin.de/resource/supplementary/12913_2010_1442_MOESM1_ESM.pdf/9528138)

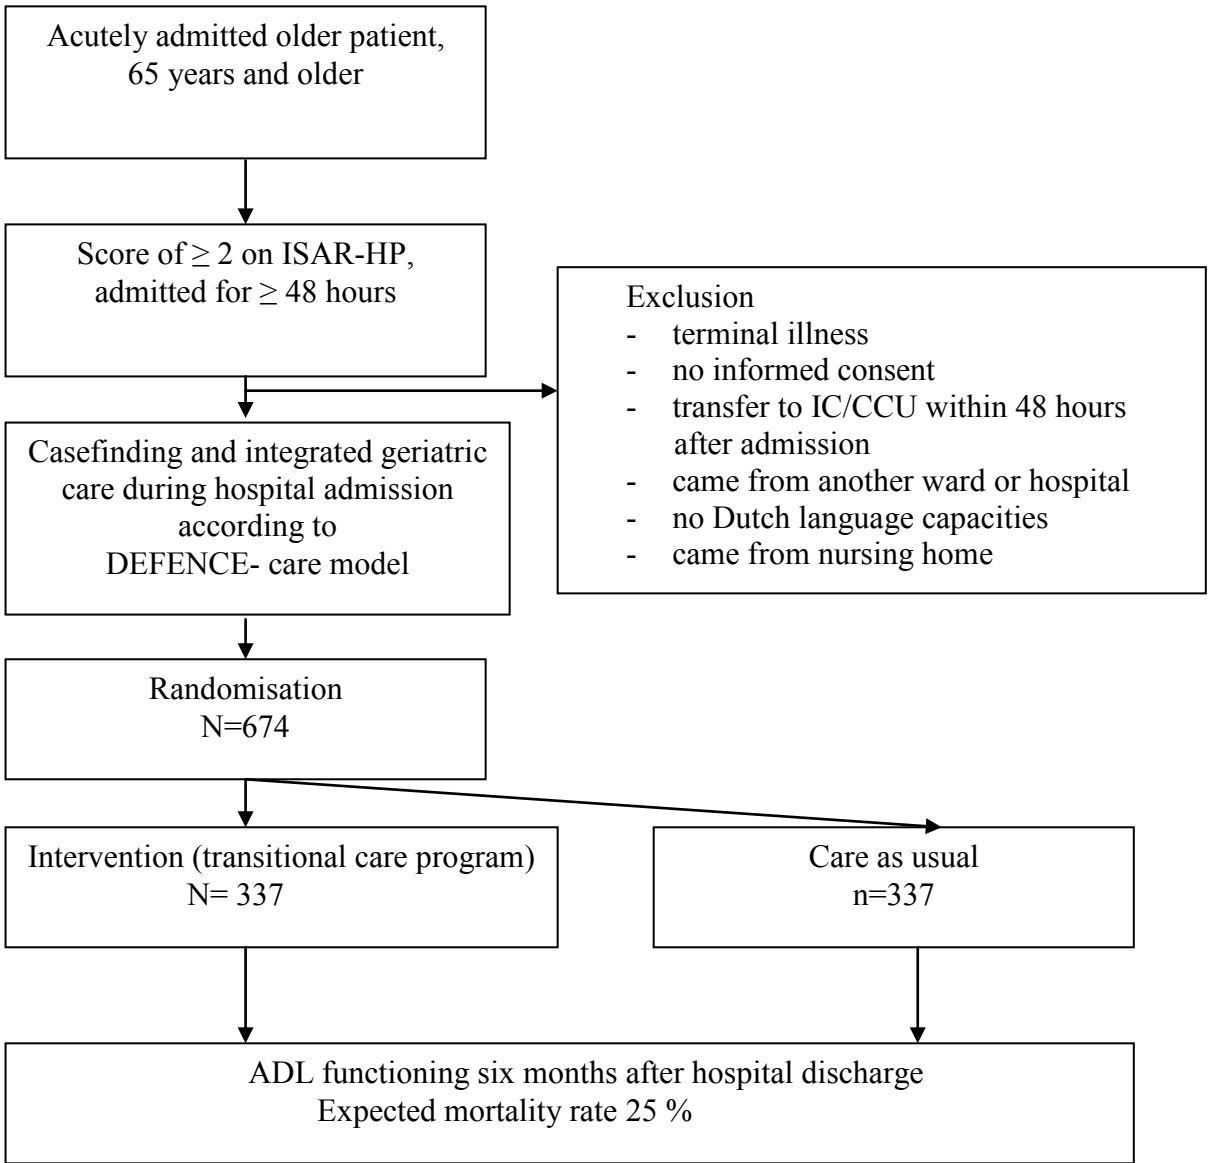

Supplement: MOESM1 [file 9528138]
